# Supplementary material
Source: Springer Nature journal article supplement (https://www.springermedizin.de/resource/supplementary/12879_2010_1489_MOESM1_ESM.pdf/9442652)
Supplement: MOESM1 [file 9442652]

# Number of clinical specimens

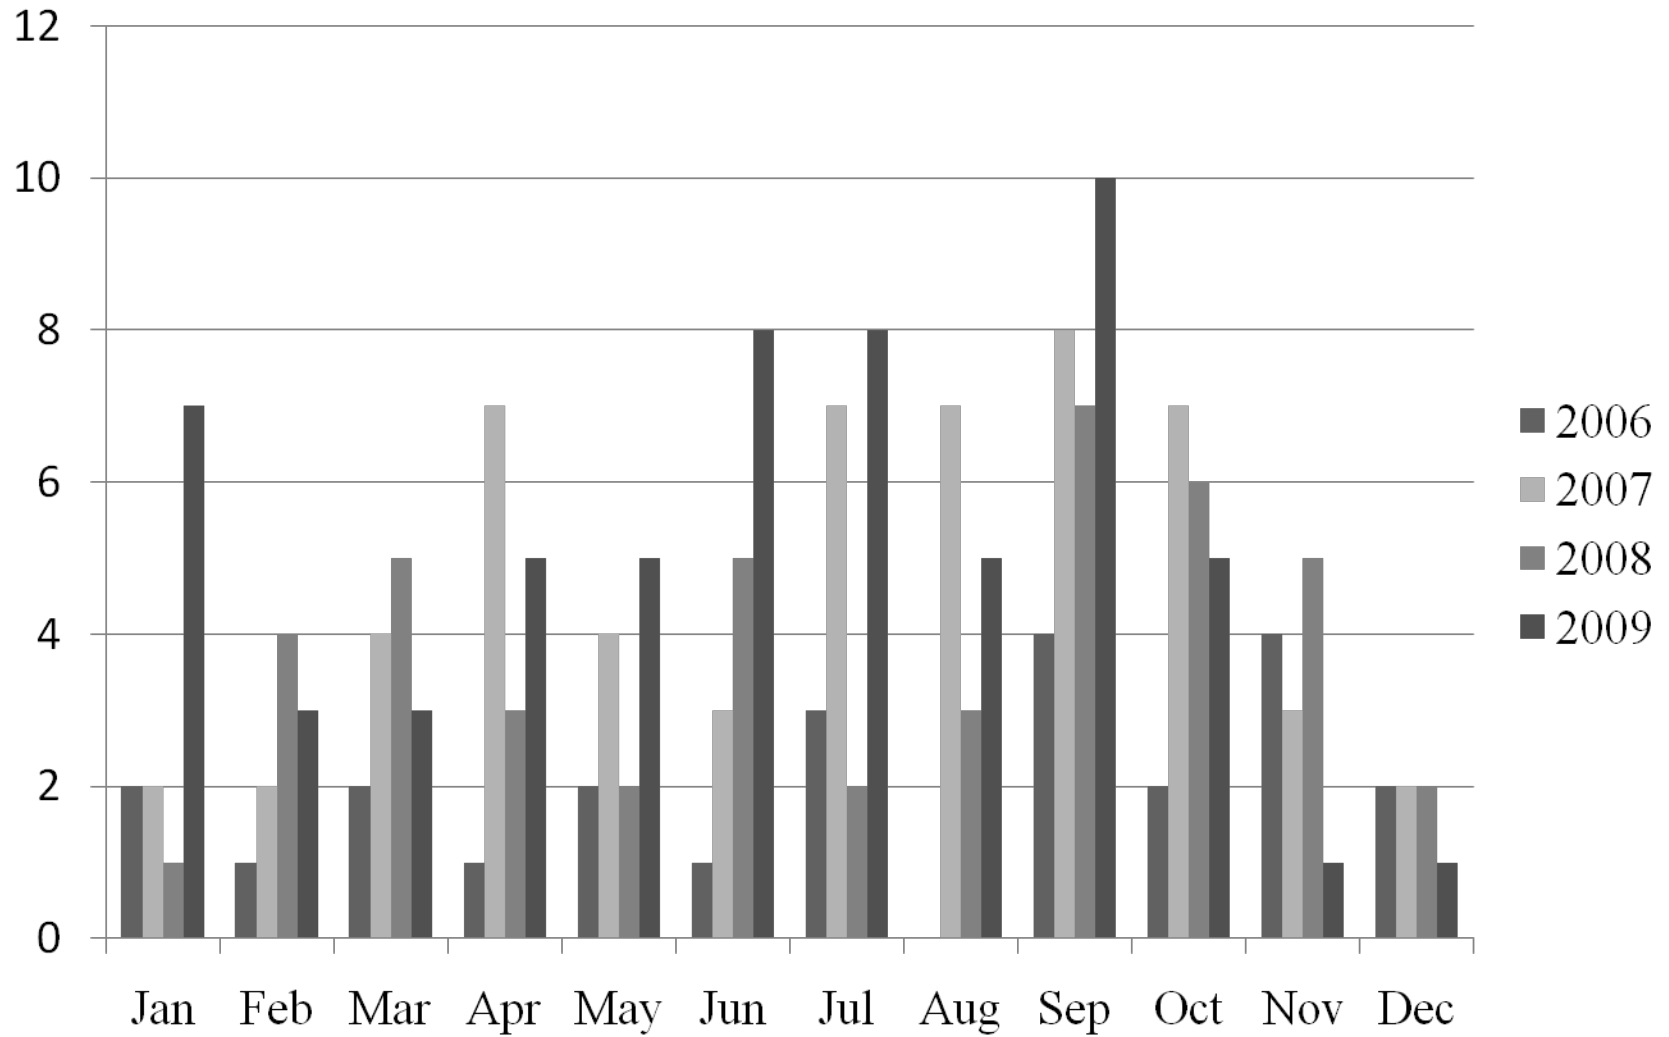

Figure 1. Number of patients infected or colonized with *S. agalactiae* in 2006, 2007, 2008, and 2009 by months.
